# Supplementary material for: The Influence of Lycopene, [6]-Gingerol, and Silymarin on the Apoptosis on U-118MG Glioblastoma Cells In Vitro Model
Source: PubMed Central journal article supplement (PMC7019537; doi:10.3390/nu12010096), 2019-12-30
Supplement: nutrients-12-00096-s001.pdf [file nutrients-12-00096-s001.pdf]

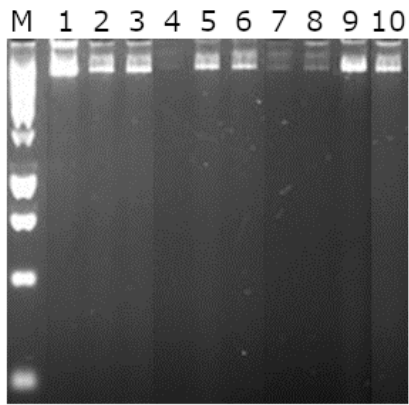

Fig. 1 Detection of apoptotic DNA ladder in U118-MG cell line after 48-hours incubation. Lane M: standard molecular size marker (1 Kb). Lane 1: cells treated with 50  $\mu$ M silymarin, lane 2: cells treated with 100  $\mu$ M silymarin, lane 3: cells treated with 200  $\mu$ M silymarin, lane 4: cells treated with 5  $\mu$ M lycopene, lane 5: cells treated with 10  $\mu$ M lycopene, lane 6: cells treated with 50  $\mu$ M lycopene, lane 7: cells treated with 50  $\mu$ M [6]-gingerol, lane 8: cells treated with 100  $\mu$ M [6]-gingerol, lane 9: cells treated with 500  $\mu$ M [6]-gingerol, lane 10: control with 0.5% DMSO
